# Supplementary material for: Elevated blood lactate in resting conditions correlate with post-exertional malaise severity in patients with Myalgic encephalomyelitis/Chronic fatigue syndrome
Source: PubMed Central journal article supplement (PMC6906377; doi:10.1038/s41598-019-55473-4), 2019-12-11
Supplement: 41598_2019_55473_MOESM1_ESM.pdf [file 41598_2019_55473_MOESM1_ESM.pdf]

Elevated blood lactate in resting conditions correlate with post-exertional malaise severity in patients with Myalgic encephalomyelitis/Chronic fatigue syndrome

Alaa Ghali, Carole Lacout, Maria Ghali, Aline Gury, Anne-Berengere Beucher, Pierre Lozac'h, Christian Lavigne, Geoffrey Urbanski.

Supplementary Table SI 1 Lactate measurements data

| ID  | Elevated lactates | T1   | T2   | T3   | T4   | T5   | T6   | T7   | T8   |
|-----|-------------------|------|------|------|------|------|------|------|------|
| 1   | 1                 | 0,59 | 2,06 | 0,7  | 1,67 | 1,07 | 1,33 | 1,04 | 1,37 |
| 2   | 1                 | NA   | 2,47 | 1,43 | 1,76 | 1,59 | 1,29 | 1,06 | 1,83 |
| 6   | 1                 | 1,35 | 2,12 | 1,35 | 1,35 | 1,23 | 1,95 | 1,76 | NA   |
| 8   | 1                 | 0,6  | 2,44 | 1,38 | 1,63 | 1,05 | 1,57 | 1,45 | 1,3  |
| 19  | 1                 | 0,79 | 2,34 | NA   | 1,54 | 0,89 | 1,76 | 1,3  | 1,35 |
| 20  | 1                 | 0,79 | 2,01 | 0,93 | 1,41 | 0,93 | 1,26 | 0,81 | 1,94 |
| 23  | 1                 | NA   | 2,11 | 1,26 | 1,02 | 1,17 | 1,24 | 1,94 | 0,86 |
| 27  | 1                 | 0,69 | 2,06 | 1,22 | 1,4  | 0,99 | 1,22 | 1,29 | 2,02 |
| 41  | 1                 | 1,53 | 1,68 | 1,19 | 1,78 | 1,83 | 1,59 | 2,12 | 1,93 |
| 43  | 1                 | 0,69 | 1,27 | 0,97 | 1,3  | 1,2  | 1,28 | 2,15 | 1,2  |
| 44  | 1                 | 2,32 | 0,82 | 0,88 | 0,68 | 1,35 | 1,26 | 1,23 | 0,82 |
| 46  | 1                 | NA   | 2,24 | 1,14 | 0,8  | 0,89 | 1,1  | 1,25 | 1,1  |
| 55  | 1                 | 1,43 | 2,76 | 1,64 | 1,21 | 1,05 | 1,4  | 1,1  | 1,94 |
| 58  | 1                 | 1,01 | 1,71 | 0,93 | 1,63 | 1,15 | 1,34 | 1,03 | 2,54 |
| 62  | 1                 | 1,27 | 2,96 | 2,02 | NA   | 1,43 | 1,42 | 1,17 | 1,97 |
| 72  | 1                 | 0,92 | 1,38 | 1,65 | 1,37 | 1,11 | 1,11 | 0,89 | 2,21 |
| 74  | 1                 | 0,6  | 1,92 | 1,98 | 1,14 | 0,92 | 1,15 | NA   | 2,25 |
| 78  | 1                 | 0,91 | 1,97 | 1,11 | 1,31 | 1,13 | 0,92 | 0,79 | 2,08 |
| 79  | 1                 | 0,81 | 2,04 | 0,83 | 1,62 | 1    | 1,39 | 0,87 | 0,81 |
| 82  | 1                 | 0,92 | 2,31 | 1,49 | 1,83 | 1,3  | 1,4  | 0,98 | 1,88 |
| 84  | 1                 | 1,08 | 2,62 | 0,79 | 1,39 | 1,31 | 1,53 | 0,93 | 2,33 |
| 86  | 1                 | 1,03 | 2,79 | 1,36 | 1,71 | 1,32 | 1,41 | 1,15 | 2,32 |
| 87  | 1                 | 0,77 | 2,15 | 1,17 | 1,46 | 1,4  | 1,45 | NA   | 1,14 |
| 90  | 1                 | 0,79 | 2,12 | 0,77 | 0,57 | 0,7  | 0,89 | 0,61 | NA   |
| 94  | 1                 | 2,53 | NA   | 1,92 | 2,32 | 1,94 | 1,8  | 1,75 | 1,96 |
| 103 | 1                 | 1,43 | 2,15 | 1,5  | 2,25 | 1,44 | 1,4  | NA   | 1,72 |
| 105 | 1                 | 0,95 | 2,41 | 1,65 | 1,84 | 1,52 | NA   | 1,61 | 1,55 |
| 108 | 1                 | 1,1  | 2,16 | 0,98 | 1,79 | 1,46 | NA   | 1,12 | 1,9  |
| 109 | 1                 | 1,25 | 2,41 | 1,16 | 1,74 | 1    | 2,45 | 0,55 | 1,84 |

|     |   |      |      |      |      |      |      |      |      |
|-----|---|------|------|------|------|------|------|------|------|
| 110 | 1 | 0,52 | 2,1  | 0,66 | 1,57 | NA   | 0,91 | 0,79 | 1,46 |
| 112 | 1 | 1,18 | 3,02 | 0,93 | 2,22 | 1,77 | 1,16 | 0,78 | 1,63 |
| 115 | 1 | 1,26 | 2,17 | 1,25 | 1,84 | 1,64 | 1,6  | 1,07 | 2,79 |
| 119 | 1 | 0,71 | 1,58 | 1,17 | 2,56 | 1,05 | 1,07 | 0,9  | 1,41 |
| 122 | 1 | 4,06 | 3,84 | 2,58 | 2,96 | 2,18 | 2,55 | 2,54 | 3,14 |
| 123 | 1 | 0,99 | 1,25 | NA   | 1,27 | NA   | 2,37 | 0,57 | 1,65 |
| 128 | 1 | 1,66 | 1,93 | 1,78 | 1,23 | 2,14 | 1,15 | 0,77 | 1,51 |
| 129 | 1 | 0,82 | 1,88 | 0,8  | 2,18 | 2,06 | 1,4  | 0,82 | NA   |
| 131 | 1 | 0,51 | 1,98 | 1,24 | 2,15 | 1,54 | 1,03 | 1,05 | 1,4  |
| 135 | 1 | 1,22 | 2,18 | 1,02 | 1,5  | 1,25 | 1,54 | 0,89 | 2    |
| 136 | 1 | 0,8  | 0,8  | 2,41 | 1,17 | NA   | 1,23 | 1,14 | NA   |
| 137 | 1 | 1,07 | 2,62 | NA   | 2,29 | 1,57 | 1,69 | 1,59 | 1,96 |
| 139 | 1 | 0,7  | 2,07 | 1,85 | NA   | NA   | 1,06 | 0,67 | 1,5  |
| 143 | 1 | NA   | 2,82 | 1,25 | 1,84 | NA   | 1,57 | 1,27 | 2,08 |
| 144 | 1 | 0,73 | 2,35 | 0,95 | 1,67 | 1,06 | NA   | 1,33 | 1,39 |
| 146 | 1 | NA   | 2,39 | 1,32 | 1,82 | 1,36 | 1,17 | 0,8  | 2,1  |
| 147 | 1 | 1,57 | 2,47 | 1,74 | 2,05 | 1,46 | 1,43 | 1,16 | 2,22 |
| 148 | 1 | 1,07 | 2,14 | 1,13 | 1,2  | 1,1  | 1,4  | 1,17 | 1,42 |
| 149 | 1 | 0,75 | 2,59 | 1,2  | 0,86 | 0,67 | 2,13 | 0,74 | 1,13 |
| 151 | 1 | 0,82 | 2,88 | 1,93 | 1,56 | 1,53 | 1,47 | 1,9  | 1,68 |
| 152 | 1 | 0,81 | 2,35 | 0,56 | 1,19 | 0,61 | 0,56 | 0,5  | 0,93 |
| 159 | 1 | 0,76 | 2,16 | 0,64 | 0,86 | 0,82 | 0,73 | 0,47 | 1,6  |
| 160 | 1 | 1,84 | 2,58 | 1,29 | 1,66 | 0,99 | 1,76 | 1,15 | 1,95 |
| 161 | 1 | 0,71 | 2,62 | NA   | 1,67 | 1,53 | 2,01 | 1,31 | 1,23 |
| 163 | 1 | 1,2  | 2,26 | 1,39 | 1,52 | NA   | 1,94 | 1,05 | 1,82 |
| 167 | 1 | 0,96 | 2,35 | 1,03 | 1,21 | NA   | 1,88 | 1,07 | 1,59 |
| 7   | 0 | NA   | 1,5  | 0,78 | NA   | 1,85 | 0,9  | 0,63 | 1,81 |
| 10  | 0 | 0,63 | 1,68 | 1,25 | 1,49 | 0,85 | 0,61 | 0,89 | 1,15 |
| 12  | 0 | 0,58 | 1,24 | 1,04 | 1,48 | 1,1  | 1,27 | 1,26 | 1,37 |
| 16  | 0 | 0,64 | 1,7  | 1,07 | 1,49 | 1,3  | 1,22 | 0,62 | 1,49 |
| 18  | 0 | 0,79 | 1,66 | 0,94 | 1,62 | 1,36 | 1,59 | 0,81 | 1,51 |
| 21  | 0 | 0,57 | 1,1  | 1,3  | 1,55 | 0,92 | 1,11 | 0,92 | 1,1  |
| 22  | 0 | 0,52 | NA   | 0,9  | 1,06 | NA   | 1,17 | 0,99 | 0,7  |
| 26  | 0 | 1,31 | 1,16 | 0,76 | 1,16 | 0,92 | 1,02 | 0,76 | 1,49 |
| 30  | 0 | 1,44 | 1,77 | 0,86 | 1,27 | 0,91 | 1,19 | 1,18 | 1,52 |
| 32  | 0 | 0,57 | 1,92 | 1,76 | 1,71 | 1,23 | 1,29 | 0,87 | 1,38 |
| 33  | 0 | 0,55 | 0,84 | 0,95 | 0,55 | 0,56 | 0,59 | 0,43 | 1,08 |
| 35  | 0 | 0,49 | 1,82 | 1,29 | 1,42 | 1,26 | 0,87 | 0,97 | 1,48 |

|     |   |      |      |      |      |      |      |      |      |
|-----|---|------|------|------|------|------|------|------|------|
| 36  | 0 | 0,6  | 1,17 | 0,69 | 0,95 | 0,68 | NA   | 0,79 | 0,6  |
| 37  | 0 | 0,55 | 1,39 | 0,99 | 1,16 | 0,97 | 1,23 | 0,87 | 1,48 |
| 38  | 0 | 0,57 | 1,35 | 0,67 | 1,59 | 0,93 | 0,72 | 0,75 | 1,54 |
| 39  | 0 | NA   | 1,9  | 0,73 | 1,31 | 0,97 | 1,03 | 1,14 | 1,16 |
| 40  | 0 | 0,53 | 1,69 | NA   | 1,29 | 1,07 | 1,1  | 1,06 | 1,45 |
| 42  | 0 | 0,52 | 0,87 | 0,39 | 0,99 | 0,52 | 1,11 | NA   | 1,37 |
| 48  | 0 | 0,49 | 1,01 | 0,5  | 0,99 | 0,84 | 1,04 | 1,04 | 1,17 |
| 49  | 0 | 0,66 | 1,46 | 1,37 | 1,52 | 1,17 | 0,81 | 1,12 | 1,55 |
| 50  | 0 | 0,69 | 1,03 | 0,66 | 1,07 | 0,62 | 1,19 | 0,5  | 1,08 |
| 52  | 0 | 1,31 | 1,94 | 1,7  | 1,37 | 1,38 | NA   | NA   | 1,54 |
| 56  | 0 | 0,61 | NA   | 0,92 | 0,92 | 1,4  | 1,2  | 0,75 | 0,91 |
| 57  | 0 | 0,66 | 1,54 | 1,12 | 0,85 | 1,18 | 0,96 | 1,21 | 1,06 |
| 59  | 0 | 0,65 | NA   | 1,75 | 1,21 | 1,03 | 1,88 | 1,37 | 1,93 |
| 60  | 0 | 0,51 | 1,67 | 0,97 | 1,29 | 0,63 | 1,1  | 1    | 1,31 |
| 64  | 0 | 0,79 | 1,11 | 0,75 | 0,89 | 0,57 | 0,64 | 0,59 | 0,73 |
| 65  | 0 | 0,66 | NA   | 0,54 | 1,56 | 1,29 | 1,31 | 0,79 | 1,66 |
| 66  | 0 | 0,48 | 1,79 | 0,66 | 1,33 | 1,03 | 0,85 | 0,77 | 1,38 |
| 69  | 0 | 0,63 | 1,72 | 1,24 | 1,4  | 0,87 | 1,05 | NA   | 1,78 |
| 71  | 0 | 0,82 | 1,61 | 1,68 | 1,51 | 1,27 | 1,72 | NA   | 1,58 |
| 76  | 0 | 1    | 1,51 | 0,81 | 1,89 | 0,89 | 0,87 | 0,83 | 1,37 |
| 80  | 0 | 0,55 | 1,01 | NA   | 0,9  | 0,62 | 0,82 | 0,6  | 0,9  |
| 81  | 0 | 0,82 | 1,36 | 1,09 | 1,01 | 0,83 | 0,63 | 0,65 | NA   |
| 83  | 0 | 0,89 | 1,17 | 1,12 | 0,96 | 1,08 | 1,01 | 0,78 | 1,23 |
| 88  | 0 | 0,81 | 1,45 | 0,57 | 0,9  | 0,76 | 0,94 | 0,86 | 1,11 |
| 89  | 0 | 0,6  | 1,03 | 0,92 | 0,58 | 0,52 | 0,97 | 0,59 | 0,48 |
| 91  | 0 | 0,48 | 1,65 | 0,79 | 1,22 | 0,98 | NA   | 0,99 | 1,45 |
| 92  | 0 | 0,57 | 1,38 | 0,59 | NA   | 1,34 | 1,06 | 0,73 | 1,68 |
| 95  | 0 | 1,72 | 1,76 | 0,87 | 1,32 | 1,09 | 1,16 | 1,11 | 1,26 |
| 96  | 0 | 1,56 | 1,7  | 1,24 | 1,54 | 1,08 | 1,31 | 1,09 | 1,38 |
| 99  | 0 | 0,93 | 1,35 | 1,34 | 1,55 | 1,3  | 1,15 | 0,78 | 1,78 |
| 100 | 0 | 0,79 | 1,5  | 0,81 | 1,15 | 0,81 | 1,23 | 0,9  | 0,91 |
| 101 | 0 | 0,91 | 1,8  | 0,78 | 1,39 | 0,67 | 1,94 | 0,64 | NA   |
| 102 | 0 | 1,11 | 1,5  | 0,78 | 1,67 | 0,89 | 0,55 | 0,66 | 1,21 |
| 104 | 0 | 0,74 | 1,76 | 0,94 | 1,41 | NA   | NA   | 0,78 | 1,1  |
| 106 | 0 | 0,79 | 1,2  | 0,88 | 1,33 | 0,97 | 1,25 | 0,9  | NA   |
| 111 | 0 | 1,15 | 1,82 | 0,97 | 1,98 | 1,46 | 1,26 | 0,98 | 1,75 |
| 117 | 0 | 0,83 | 1,48 | 0,97 | 1,26 | 1,36 | 1,54 | 0,89 | 1,56 |

|     |   |      |      |      |      |      |      |      |      |
|-----|---|------|------|------|------|------|------|------|------|
| 118 | 0 | 0,84 | 1,94 | 1,41 | 1,43 | 1,13 | 1,54 | 1,5  | 1,81 |
| 120 | 0 | 0,96 | 1,92 | 1,64 | 1,29 | 1,25 | 1,46 | 0,87 | 1,37 |
| 121 | 0 | 1,96 | 1,95 | NA   | 1,57 | 1,3  | 1,56 | 0,71 | 1,93 |
| 125 | 0 | 1,01 | 1,73 | 1,16 | 1,43 | 0,99 | 1,11 | 1,07 | 1,21 |
| 130 | 0 | 0,79 | NA   | 0,92 | 1,67 | 1,13 | 0,72 | 0,52 | 1,12 |
| 132 | 0 | 0,62 | 0,98 | 0,65 | 0,83 | 0,92 | 1,43 | 0,91 | 1,53 |
| 133 | 0 | 0,63 | 1,78 | 1,52 | 1,14 | 0,95 | 1,52 | 1,44 | 0,85 |
| 138 | 0 | 0,39 | 1,17 | 1,24 | 0,67 | 0,44 | 0,75 | 0,36 | 0,74 |
| 153 | 0 | 0,96 | NA   | 0,84 | 1,2  | 1,03 | 1,07 | 1,21 | 1,01 |
| 154 | 0 | 0,66 | 1,51 | 1    | 1,23 | NA   | 1,23 | 1,29 | 1,37 |
| 155 | 0 | 0,56 | 1,12 | 1,28 | 1,25 | 1,21 | 1,25 | 1,2  | 1,7  |
| 156 | 0 | 0,71 | 1,62 | 1,26 | 1,32 | 1,02 | 1,17 | 1,46 | 1,9  |
| 157 | 0 | 0,43 | 1,19 | 0,84 | 1,11 | 0,82 | 0,53 | 0,53 | 1,46 |
| 158 | 0 | 0,46 | 1,47 | 0,83 | 1,61 | 1    | 0,83 | 0,96 | 1,35 |
| 162 | 0 | 0,71 | 1,88 | 1,48 | 1,38 | 1,6  | 1,11 | 0,98 | 1,56 |
| 164 | 0 | 0,59 | 0,58 | 0,86 | 0,88 | 0,65 | 0,77 | 0,72 | 1,34 |
| 165 | 0 | 0,56 | NA   | 0,83 | 1,21 | 0,62 | 1,74 | 0,98 | 0,97 |
| 166 | 0 | 1,26 | 1,6  | 1,01 | 1,34 | 1,31 | NA   | 1,14 | NA   |
| 168 | 0 | 0,67 | 1,86 | 0,94 | 0,96 | 0,74 | 1,27 | 0,75 | NA   |

Elevated blood lactate levels are equal or more than 2 mmol/L
